# Supplementary material for: Universal Linear Fit Identification: A Method Independent of Data, Outliers and Noise Distribution Model and Free of Missing or Removed Data Imputation
Source: PLoS One. 2015 Nov 16;10(11):e0141486. doi: 10.1371/journal.pone.0141486 (PMC4646355; doi:10.1371/journal.pone.0141486)
Supplement: S2 File — (XLSX) [file pone.0141486.s002.xlsx]

## Sheet: Info
	Universal Linear Fit Identification: A Method Independent of Data, Outliers and Noise Distribution Model and Free of Missing or Removed Data Imputation
	K.K.L.B. Adikaram1,2,3¶, M.A. Hussein1&, M. Effenberger2&, T. Becker4&
	1 Research Group of Bio-Process Analysis Technology, Technische Universität München, Weihenstephaner Steig 20, 85354 Freising, Germany.
	2 Institute for Agricultural Engineering and Animal Husbandry, Bavarian State Research Center for Agriculture, Vöttinger Straße 36, 85354 Freising, Germany.
	3 Computer Unit, Faculty of Agriculture, University of Ruhuna, Mapalana, Kamburupitiy, Sri Lanka.
	4 Lehrstuhl für Brau- und Getränketechnologie, Technische Universität München, Weihenstephaner Steig 20, 85354 Freising, Germany.
	Corresponding author
	E-mail: lasantha@daad-alumni.de (KKLBA)
	Content : Data sets of all the plots in Fig. 4.

## Sheet: Plot a1
Index	Value	Correct Value
0	25500	-15
1	-10	-10
2	60000	-5
3	3000	0
4	5	5
5	10	10
6	15.0001	15
7	58700	20
8	25	25
9	30	30

## Sheet: Plot a2
Index	Value	Correct Value
0	-25500	-15
1	-10	-10
2	-5	-5
3	20000	0
4	60000	5
5	10	10
6	14.9999	15
7	-58700	20
8	25	25
9	30000	30

## Sheet: Plot b1
Index	Value	Correct Value
0	-25500	15
1	10	10
2	-5.00001	5
3	-20000	0
4	-60000	-5
5	-10	-10
6	-15	-15
7	-58700	-20
8	-25	-25
9	-20000	-30

## Sheet: Plot b2
Index	Value	Correct Value
0	-25500	15
1	10	10
2	5.00001	5
3	20000	0
4	60000	-5
5	-10	-10
6	-15	-15
7	-58700	-20
8	-25	-25
9	20000	-30

## Sheet: Plot c1
Index	Value	Correct Value
0	100	100
1	25500	100
2	110.01	100
3	20000	100
4	60000	100
5	100	100
6	100.1	100
7	100	100
8	100	100
9	10200	100

## Sheet: Plot c2
Index	Value	Correct Value
0	100	100
1	55500	100
2	-110.01	100
3	20000	100
4	-60000	100
5	100	100
6	100	100
7	100	100
8	99.9999	100
9	100	100
